# Supplementary material for: PUF-8 and TCER-1 are essential for normal levels of multiple mRNAs in the C. elegans germline
Source: PubMed Central journal article supplement — Development. 2013 Mar 15;140(6):1312–20. doi: 10.1242/dev.087833 (PMC3585663; doi:10.1242/dev.087833), 2013-03-15
Supplement: supp_140.6.1312_DEV087833.pdf [file supp_140.6.1312_DEV087833.pdf]

**Table S1. *C. elegans* strains used in this study**

| <b>Strains carrying transgenes</b> |                                                                                                                 |                                                                                            |                        |
|------------------------------------|-----------------------------------------------------------------------------------------------------------------|--------------------------------------------------------------------------------------------|------------------------|
| <b>Strain</b>                      | <b>Transgene</b>                                                                                                | <b>Genotype</b>                                                                            | <b>Reference</b>       |
| IT213                              | <i>tcer-1 prom:tcer-1ORF:gfp:tcer-1 3'utr</i>                                                                   | <i>unc-119(ed3) III; kpIs(pPK6)</i>                                                        | This study             |
| IT283                              | <i>tcer-1 prom:tcer-1ORF:mCherry:tcer-1 3'utr</i>                                                               | <i>unc-119(ed3) III; kpIs(pPK20)</i>                                                       | This study             |
| IT30                               | <i>puf-8 prom:puf-8 ORF:gfp:puf-8 3'utr</i>                                                                     | <i>unc-119(ed3) III; kpIs(pMP15)</i>                                                       | (Ariz et al., 2009)    |
| JH2060                             | <i>pie-1 prom:gfp:gld-1 ORF:gld-1 3'utr</i>                                                                     | <i>unc-119(ed3) III; axIs1498</i>                                                          | (Merritt et al., 2008) |
| IT560                              | <i>pie-1 prom:4xcMyc:mCherry:ncbp-2<br/>ORF:cMyc:hip-1 3'utr</i>                                                | <i>unc-119(ed3) III; kpIs(pPK46)</i>                                                       | This study             |
| IT305                              | <i>pie-1 prom:mCherry:emr-1 ORF:hip-1 3'utr</i>                                                                 | <i>unc-119(ed3) III; kpIs(pPK19)</i>                                                       | This study             |
| XA3507                             | <i>pie-1 prom:gfp:lem-2 ORF:pie-1 3'utr</i>                                                                     | <i>unc-119(ed3) III; qals3507</i>                                                          | (Galy et al., 2003)    |
| IT293                              | <i>tcer-1 prom:tcer-1ORF:mCherry:tcer-1 3'utr &amp;<br/>pie-1 prom:gfp:lem-2 ORF:pie-1 3'utr</i>                | <i>unc-119(ed3) III; qals3507; kpIs(pPK20)</i>                                             | This study             |
| IT311                              | <i>puf-8 prom:puf-8 ORF:gfp:puf-8 3'utr &amp;<br/>pie-1 prom:mCherry:emr-1 ORF:hip-1 3'utr</i>                  | <i>unc-119(ed3) III; kpIs(pMP15);<br/>kpIs(pPK19)</i>                                      | This study             |
| IT363                              | <i>pie-1 prom:gfp:gld-1 ORF:gld-1 3'utr &amp;<br/>pie-1 prom:mCherry:emr-1 ORF:hip-1 3'utr</i>                  | <i>unc-119(ed3) III; axIs1498; kpIs(pPK19)</i>                                             | This study             |
| IT671                              | <i>pie-1 prom:4xcMyc:mCherry:ncbp-2<br/>ORF:cMyc:hip-1 3'utr &amp;<br/>pie-1 prom:gfp:lem-2 ORF:pie-1 3'utr</i> | <i>unc-119(ed3) III; kpIs(pPK46); qals3507</i>                                             | This study             |
| IT297                              | <i>puf-8 prom:puf-8 ORF:gfp:puf-8 3'utr &amp;<br/>tcer-1 prom:tcer-1ORF:mCherry:tcer-1 3'utr</i>                | <i>unc-119(ed3) III; kpIs(pMP15);<br/>kpIs(pPK20)</i>                                      | This study             |
| IT639                              | <i>puf-8 prom:puf-8 ORF:gfp:puf-8 3'utr &amp;<br/>pie-1 prom:4xcMyc:mCherry:ncbp-2<br/>ORF:cMyc:hip-1 3'utr</i> | <i>unc-119(ed3) III; kpIs(pMP15);<br/>kpIs(pPK46)</i>                                      | This study             |
| IT539                              | <i>puf-8 prom:puf-8 ORF:gfp:puf-8 3'utr</i>                                                                     | <i>puf-8(ok302) unc-4(e120) / mnC1 II;<br/>unc-119(ed3) III; kpIs(pMP15)</i>               | This study             |
| IT549                              | <i>puf-8 prom:puf-8 ORF:gfp:puf-8 3'utr</i>                                                                     | <i>tcer-1(tm1452) puf-8(zh17) rol-6(e187) /<br/>mnC1 II; unc-119(ed3) III; kpIs(pMP15)</i> | This study             |
| IT483                              | <i>puf-8 prom:puf-8 ORFΔ3-49aa:gfp:puf-8 3'utr</i>                                                              | <i>unc-119(ed3) III; kpIs(pPK45)</i>                                                       | This study             |
| IT526                              | <i>puf-8 prom:puf-8 ORFΔ3-49aa:gfp:puf-8 3'utr</i>                                                              | <i>puf-8(ok302) unc-4(e120) / mnC1 II;<br/>unc-119(ed3) III; kpIs(pPK45)</i>               | This study             |

|                      |                                                           |                                                                                        |            |
|----------------------|-----------------------------------------------------------|----------------------------------------------------------------------------------------|------------|
| IT525                | <i>puf-8 prom:puf-8 ORFΔ3-49aa:gfp:puf-8 3'utr</i>        | <i>tcer-1(tm1452) puf-8(zh17) rol-6(e187) / mnC1 II; unc-119(ed3) III; kpIs(pPK45)</i> | This study |
| IT445                | <i>puf-8 prom:puf-8 ORFΔ51-100aa:gfp:puf-8 3'utr</i>      | <i>unc-119(ed3) III; kpIs(pPK39)</i>                                                   | This study |
| IT454                | <i>puf-8 prom:puf-8 ORFΔ51-100aa:gfp:puf-8 3'utr</i>      | <i>puf-8(ok302) unc-4(e120) / mnC1 II; unc-119(ed3) III; kpIs(pPK39)</i>               | This study |
| IT479                | <i>puf-8 prom:puf-8 ORFΔ51-100aa:gfp:puf-8 3'utr</i>      | <i>tcer-1(tm1452) puf-8(zh17) rol-6(e187) / mnC1 II; unc-119(ed3) III; kpIs(pPK39)</i> | This study |
| IT508                | <i>puf-8 prom:puf-8 ORFΔ111-143aa:gfp:puf-8 3'utr</i>     | <i>unc-119(ed3) III; kpIs(pPK44)</i>                                                   | This study |
| IT535                | <i>puf-8 prom:puf-8 ORFΔ111-143aa:gfp:puf-8 3'utr</i>     | <i>puf-8(ok302) unc-4(e120) / mnC1 II; unc-119(ed3) III; kpIs(pPK44)</i>               | This study |
| IT536                | <i>puf-8 prom:puf-8 ORFΔ111-143aa:gfp:puf-8 3'utr</i>     | <i>tcer-1(tm1452) puf-8(zh17) rol-6(e187) / mnC1 II; unc-119(ed3) III; kpIs(pPK44)</i> | This study |
| IT350                | <i>puf-8 prom:puf-8 ORFΔ3-143aa:gfp:puf-8 3'utr</i>       | <i>unc-119(ed3) III; kpIs(pPK30)</i>                                                   | This study |
| IT377                | <i>puf-8 prom:puf-8 ORFΔ3-143aa:gfp:puf-8 3'utr</i>       | <i>puf-8(ok302) unc-4(e120) / mnC1 II; unc-119(ed3) III; kpIs(pPK30)</i>               | This study |
| IT380                | <i>puf-8 prom:puf-8 ORFΔ3-143aa:gfp:puf-8 3'utr</i>       | <i>tcer-1(tm1452) puf-8(zh17) rol-6(e187) / mnC1 II; unc-119(ed3) III; kpIs(pPK30)</i> | This study |
| <b>Other strains</b> |                                                           |                                                                                        |            |
| <b>Strain</b>        | <b>Genotype</b>                                           | <b>Reference</b>                                                                       |            |
| IT60                 | <i>puf-8(zh17) unc-4(e120) / mnC1 II</i>                  | (Ariz et al., 2009)                                                                    |            |
| JH1500               | <i>puf-8(ok302) unc-4(e120) / mnC1 II</i>                 | (Subramaniam and Seydoux, 2003)                                                        |            |
| IT325                | <i>tcer-1(tm1452) II</i>                                  | This study                                                                             |            |
| IT168                | <i>tcer-1(tm1452) puf-8(zh17) rol-6(e187) / mnC1 II</i>   | This study                                                                             |            |
| IT668                | <i>ZK1127.6(tm2782) II</i>                                | This study                                                                             |            |
| IT235                | <i>ZK1127.6(tm2782) puf-8(zh17) rol-6(e187) / mnC1 II</i> | This study                                                                             |            |

**Table S2. Sequences of PCR primers used for generating the transgene constructs described in this study**

| <b>Name</b> | <b>Sequence</b>                                                |
|-------------|----------------------------------------------------------------|
| KS109       | TCTGGTACCGGAAATCACCTTTCCCGAGT                                  |
| KS1222      | TCTGCCGGCCTCCCCATCAATGTTCTTTC                                  |
| KS1223      | TCTCCGCGGCGGAAAGTGATTGACCCGTA                                  |
| KS2132      | TCTGGATCCCGAATTCATAGTC                                         |
| KS2133      | TGAGATTCGGGATCCACGTA                                           |
| KS2134      | TCTCCCGGGTTGCTTTCTGCGATCCCGCT                                  |
| KS2135      | TCTCCCGGGATGAGTAAAGGAGAAGAAGTTCAC                              |
| KS2315      | TCTCCGCGGGCTGTATCCTACACCAACAG                                  |
| KS2316      | TCTGTCGACCAACAAGAGCGGGATCGCAG                                  |
| KS2326      | TCTGTCGACTTATTTGTATAGTTCATCCATGC                               |
| KS2361      | TCTGGGCCACAACAAGAGCGGGATCGC                                    |
| KS2944      | TCTCCCGGGATGGTCTCAAAGGGTGAAGA                                  |
| KS2945      | TCTGTCGACTTACTTATAACAATTCATCCATGC                              |
| KS2978      | TCTACTAGTCTTATAACAATTCATCCATGC                                 |
| KS3022      | TCTAGATCTCTATGAGTCGTCCGATTTCAAT                                |
| KS3175      | TCTGCGGCCGCCTAGGCGTAGTCTGGGACGTCGTATGGGTATTTGTATAGTTCATCCATGCC |
| KS3303      | TCTGCAGGTACCGGGCCCACTCATCAGGAACGCAGATTAC                       |
| KS3304      | TCTGCAGGGCCCCACCAAGCGCATTCTCAAAG                               |
| KS3320      | TCTGCAGGGCCCTCGTGAGATCCCTGCATATC                               |
| KS3526      | CAAATGGGATCCGAGCAGAAGCTCATCTCCGAGGAGGACCTCATGGTCTCAAAGGGTGAAGA |
| KS3551      | TCTGCAGGTACCGGGCCCGGTAGAAATATGACGGCCAT                         |
| KS3609      | TCTGCAGGGCCCTCTAATGTTCGGTCATGTCTTG                             |
| KS3612      | TCTGCAGGGCCCGATAGTACTCAAGACATGACC                              |

|        |                                                                     |
|--------|---------------------------------------------------------------------|
| KS3675 | TCTGCAGGGCCCACCAATCCAAAAAATGAACGCC                                  |
| KS3703 | TATAAGACTAGTATGGTCTTCGATCCAAGAAC                                    |
| KS3704 | CCTTAAGGCGCCTTAGAGGTCCTCCTCGGAGATGAGCTTCTGCTCACCTTTTTGAGCAATAGCGC   |
| KS3709 | TCTGACAGATCTGAGCAGAAGCTCATCTCCGAGGAGGACCTCGAGCAGAAGCTCATCTCCGAGGAGG |
| KS3710 | GTCAGAGGATCCGAGGTCCTCCTCGGAGATGAGCTTCTGCTCGAGGTCCTCCTCGGAGATGAGCTTC |

**Table S3. Sequences of PCR primers used for RNA quantitation**

| RNA            | Primer name | Sequence                          | Fold enrichment with MBP::PUF-8* |
|----------------|-------------|-----------------------------------|----------------------------------|
| <i>cyb-2.1</i> | 2241        | ATGTTGCGAGTTACTACAAGC             | 3.79                             |
|                | 3087        | TCTCCCGGGTTCATTTCTGATGTTTCAGCTTC  |                                  |
| <i>fbf-1</i>   | 1666        | TCTCTAATCGACATGGACCAATC           |                                  |
|                | 1662        | GTTACGATCAATCTCGGTAG              |                                  |
| <i>fbf-2</i>   | 2665        | GCTCGCCATCAACAGAATCA              |                                  |
|                | 2666        | ATCCATGTTCTGGAGACTGG              |                                  |
| <i>egg-5</i>   | 3321        | TCTCCCGGGATGGCGTTGAACAGCGAAGTG    | 4.58                             |
|                | 2900        | GCTCCATTCTCCGATGATGG              |                                  |
| <i>hip-1</i>   | 2409        | TCAGAAGGCCGATATCGAGC              | 5.15                             |
|                | 2410        | TGTTGTGGGACAGAAGCTCC              |                                  |
| <i>mex-3</i>   | 1086        | TCTCCATGGGCATGAAGGAAGAACAAATCGC   |                                  |
|                | 1087        | TCTCTCGAGTTATCCATTGATCGGCACGAG    |                                  |
| <i>mex-5</i>   | 1030        | TCTCCATGGGCATGAAAGCGGCATCAAATAGTG |                                  |
|                | 1031        | TCTCTCGAGCTAATAGTGTCTCTTAGTCCG    |                                  |
| <i>oma-1</i>   | 1539        | TCTGAATTCATGAACGTTAACGGTGAAAAC    |                                  |
|                | 1540        | TCTGAATTCTTCTAAAGGATGCTGAATGGC    |                                  |
| <i>oma-2</i>   | 1541        | TCTGAATTCATTCGATGCAAATGAGAGC      |                                  |
|                | 1542        | TCTGAATTCGAGTGGAGACGAATCACTAT     |                                  |
| <i>pal-1</i>   | 1178        | TCTTCTAGATGTTCGGTCGATGTCAAGTC     | 3.8                              |
|                | 1179        | TCTTCTAGAGCCGAATCTTCTGTTTGT       |                                  |
| <i>pgl-1</i>   | 2669        | GGAGCTTCCAAAGACGCTCC              |                                  |
|                | 2670        | CTTGGATGATGTGATTGCCG              |                                  |
| <i>pie-1</i>   | 1034        | TCTCCATGGCTCAAACAAAGCCGATT        |                                  |
|                | 1035        | TCTCTCGAGTTAGGAAATAATAGTTGGTGG    |                                  |

|                         |      |                                        |      |
|-------------------------|------|----------------------------------------|------|
| <i>pos-1</i>            | 1028 | TCTCCATGGCTGACAACGATTTCT               | 6.62 |
|                         | 1029 | TCTCTCGAGCTAGTGATGATGGGAGGAGA          |      |
| <i>puf-5</i>            | 2675 | GATCTCAGCATTTTCAACGG                   | 4.43 |
|                         | 2676 | TTCTGGATCGACATCTGCAC                   |      |
| <i>rme-2</i>            | 2695 | CGGCATCATTCAATGGCTTC                   |      |
|                         | 2696 | TTCGGCGTCGTCAGAAATCG                   |      |
| <i>spn-4</i>            | 1088 | TCTCCATGGGCATGCAAAACACACAGATATTTACTAAC | 4.86 |
|                         | 1089 | TCTCTCGAGTTACTGGCTTGACGATTCTTTTG       |      |
| <i>cyb-2.1 pre-mRNA</i> | 2241 | ATGTTGCGAGTTACTACAAGC                  |      |
|                         | 3546 | GAGGCAACGAACCTGAAATC                   |      |
| <i>egg-5 pre-mRNA</i>   | 3157 | TCTCCCGGGGAATTCGAAGACGCTCTTCGC         |      |
|                         | 3548 | CCAACCTACAAGTTTGTATCAG                 |      |
| <i>pal-1 pre-mRNA</i>   | 3545 | CTGACCAGCTCGCAGAGATA                   |      |
|                         | 1179 | TCTTCTAGAGCCGAATCTTCTGTTTGT            |      |
| <i>pos-1 pre-mRNA</i>   | 1028 | TCTCCATGGCTGACAACGATTTCC               |      |
|                         | 2700 | CGAGGCTGAAAATTCCAGTC                   |      |
| <i>spn-4 pre-mRNA</i>   | 2839 | CAGGTAAATTTGTCGTGCCG                   |      |
|                         | 1089 | TCTCTCGAGTTACTGGCTTGACGATTCTTTTG       |      |

\*Fold enrichment values are given only for the mRNAs that showed significant enrichment (Mainpal et al., 2011).

**Table S4. DNA-binding domain fusions tested in the yeast two-hybrid assay**

| Name            | Part of PUF-8 sequence cloned in pGBDU-C2            | PCR primers                                                                                               |                                  |
|-----------------|------------------------------------------------------|-----------------------------------------------------------------------------------------------------------|----------------------------------|
| PUF8-BD         | Amino acids 1-535 (full-length)                      | KS3022                                                                                                    | Table S2                         |
|                 |                                                      | KS3024                                                                                                    | TCTAGATCTCTAGTGAGATCCCTGCATAT    |
| Partial PUF8-BD | Amino acids 143-535 ( $\Delta$ 1-143 aa)             | KS3023                                                                                                    | TCTAGATCTCTATGCACCAAGCGCATTCTCA  |
|                 |                                                      | KS3024                                                                                                    | TCTAGATCTCTAGTGAGATCCCTGCATAT    |
| N1-BD           | Amino acids 1-173 ( $\Delta$ 174-535 aa)             | KS3022                                                                                                    | Table S2                         |
|                 |                                                      | KS3181                                                                                                    | TCTGGATCCGGTGGTTGTTGGTTCCCTGT    |
| N16-BD          | Amino acids 1-50 and 101-535 ( $\Delta$ 51-100 aa)   | KS3022 and KS3551 for 1-50aa, and KS3609 and KS3320 for 101-535aa; all four sequences are given Table S2  |                                  |
| N18-BD          | Amino acids 1-110 and 144-535 ( $\Delta$ 111-143 aa) | KS3022 and KS3612 for 1-110aa, and KS3304 and KS3320 for 144-535aa; all four sequences are given Table S2 |                                  |
| N20-BD          | Amino acids 51-535 ( $\Delta$ 1-50 aa)               | KS3645                                                                                                    | TCTGCACCCGGGCAATCCAAAAAATGAACGCC |
|                 |                                                      | KS3646                                                                                                    | TCTGCACCCGGGCTAGTGAGATCCCTGCATAT |

**Table S5. Proteins tested for interaction with PUF-8 and TCER-1 in the yeast two-hybrid assay**

| Name            | Yeast homologue* | Mammalian homologue* | Functional description <sup>#</sup>                                                                                |
|-----------------|------------------|----------------------|--------------------------------------------------------------------------------------------------------------------|
| <b>PHI-11</b>   | HS155            | SF3B1                | Splicing factor 3b subunit 1                                                                                       |
| PRP-21          | PRP21            | SF3A1                | Splicing factor 3a subunit 1                                                                                       |
| UAF-1           | MRD1             | U2AF2                | Large subunit of the splicing factor U2AF                                                                          |
| LSM-4           | LSM4             | LSM4                 | Small nuclear ribonucleoprotein (snRNP)                                                                            |
| LSM-8           | LSM1             | NAA38                | snRNP                                                                                                              |
| <u>SNR-3</u>    | Sm D1            | SNRPD1               | Sm D1 is a part of heteroheptameric complex that is part of the spliceosomal U1, U2, U4 and U5 snRNPs <sup>‡</sup> |
| THOC-1          |                  | THOC1                | THOC complex component; THOC complex links transcription elongation and mRNA export machinery                      |
| THOC-2          | THO2             | THOC2                | Same as above                                                                                                      |
| <u>THOC-3</u>   | TEX1             | THOC3                | TEX1 is a component of the transcription export (TREX) complex required for nuclear mRNA export <sup>‡</sup>       |
| DDX-19          | DBP5             | DDX19                | DEAD-box helicase involved in mRNA export from the nucleus <sup>‡</sup>                                            |
| NXF-1           | MEX67            | NXF1                 | Shuttling transport receptor for nuclear export of mRNA                                                            |
| RSP-3           | NPL3             | SRSF1                | Required for splicing; influences alternative splicing                                                             |
| HEL-1           | SUB2             | DDX39                | Component of the TREX complex                                                                                      |
| ALY-1           | YRA1             | ALYREF               | RRM motif protein; required for export of TRA-1/tra-2 mRNA complexes                                               |
| ALY-2           | YRA1             | ALYREF               | RRM motif protein; required for export of TRA-1/tra-2 mRNA complexes                                               |
| ALY-3           |                  | ALYREF               | RRM motif protein; thought to promote recruitment of mRNA export factors to mRNAs                                  |
| NXT-1           | NTF2             | NXT1                 | RNA export factor                                                                                                  |
| <b>C27F2.10</b> | THP1             | PCID2                | Nuclear pore-associated protein; component of the TREX-2 complex <sup>‡</sup>                                      |
| IFE-1           | CDC33            | EIF4E                | eIF4E homolog                                                                                                      |
| IFE-5           | CDC33            | EIF4E                | Same as above                                                                                                      |
| IFG-1           | TIF4631          | EIF4G                | eIF4G                                                                                                              |
| <b>PAB-1</b>    | PAB1             | PABPC                | Polyadenylate-binding protein                                                                                      |
| <b>NCBP-2</b>   | CBC2             | NCBP2                | <i>C. elegans</i> ortholog of the CBP20 subunit of the nuclear cap binding protein complex                         |
| <b>NPP-1</b>    | Nup57            | NUP54                | Nuclear pore complex component; Central FG Nup <sup>§,¶</sup>                                                      |
| NPP-4           | Nup49            | NUP62                | Same as above                                                                                                      |
| NPP-7           | Nup60            | NUP153               | Nuclear pore complex component; Nuclear FG Nup <sup>§,¶</sup>                                                      |
| NPP-10          | Nup145N          | NUP98-               | Nuclear pore complex component; Central FG Nup <sup>§,¶</sup>                                                      |

|               |        |        |                                                                                                                                    |
|---------------|--------|--------|------------------------------------------------------------------------------------------------------------------------------------|
|               |        | NUP96  |                                                                                                                                    |
| NPP-11        | Nsp1   | NUP62  | Same as above                                                                                                                      |
| <b>NPP-14</b> | Nup159 | NUP214 | Nuclear pore complex component; Cytoplasmic FG Nup <sup>§,¶</sup>                                                                  |
| <b>RAE-1</b>  | Gle2   | RAE1   | Nuclear pore complex component; Required for mRNA export <sup>§,***</sup>                                                          |
| NPP-21        | MLP1   | TPR    | Myosin-like protein associated with the nuclear envelope, connects the nuclear pore complex with the nuclear interior <sup>‡</sup> |

Protein names shown in bold were positive for interaction with PUF-8 in the yeast two-hybrid assay (see Fig. 4A).

Protein names underlined were positive for interaction with TCER-1 in the yeast two-hybrid assay (see Fig. 4A).

\*For convenience, the corresponding more familiar yeast and mammalian homologues are also listed.

#Unless an additional reference is provided the functional description is from [www.wormbase.org](http://www.wormbase.org).

‡[www.yeastgenome.org](http://www.yeastgenome.org).

§(Galy et al., 2003).

¶(Strambio-De-Castillia et al., 2010).

\*\*\* (Rodriguez et al., 2004).
